# Supplementary material for: Tetrahedral DNA Framework-Programmed Electrochemical Biosenors with Gold Nanoparticles for Ultrasensitive Cell-Free DNA Detection
Source: MDPI journal article supplement (doi:10.3390/nano12040666), 2022-02-16
Supplement: s1 [file s1]

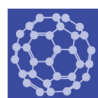

# Tetrahedral DNA Framework-Programmed Electrochemical Biosensors with Gold Nanoparticles for Ultrasensitive Cell-Free DNA Detection

Chenguang Wang <sup>1,2,†</sup>, Wei Wang <sup>3,†</sup>, Yi Xu <sup>1</sup>, Xiaoshuang Zhao <sup>4</sup>, Shuainai Li <sup>1,2</sup>, Qiuling Qian <sup>1,2</sup> and Xianqiang Mi <sup>1,2,4,5,6,\*</sup>

<sup>1</sup> Shanghai Advanced Research Institute, Chinese Academy of Sciences, Shanghai 201210, China; wangcg@sari.ac.cn (C.W.); xuyi@sari.ac.cn (Y.X.); lishuainan2019@sari.ac.cn (S.L.); qianqiuling2018@sari.ac.cn (Q.L.)

<sup>2</sup> University of Chinese Academy of Sciences, Beijing 100049, China

<sup>3</sup> Shanghai Pudong New District Zhoupu Hospital (Shanghai University of Medicine & Health Sciences Affiliated Zhoupu Hospital), Shanghai 201318, China; doctorww1978@163.com

<sup>4</sup> State Key Laboratory of Functional Material for Informatics, Shanghai Institute of Microsystem and Information Technology, Chinese Academy of Sciences, Shanghai 200050, China; zxsh1217@mail.sim.ac.cn

<sup>5</sup> CAS Center for Excellence in Superconducting Electronics (CENSE), Shanghai 200050, China

<sup>6</sup> Key Laboratory of Systems Health Science of Zhejiang Province, Hangzhou Institute for Advanced Study, University of Chinese Academy of Sciences, Chinese Academy of Sciences, Hangzhou 310024, China

\* Correspondence: mixq@mail.sim.ac.cn

† These authors contributed equally to this work.

**Table S1.** Sequences for oligonucleotide used in this work.

| Name            | Sequence (5'-3')                                                                                                    |
|-----------------|---------------------------------------------------------------------------------------------------------------------|
| A-7-capture     | GAGCGTTAGCCACACACAGTCTTTTTTTTTT <b>GATTTTCTTCCTTTTGTTTC</b>                                                         |
| B-7             | SH-C6-TTAGGCGAGTGTGGCAGAGGTGT                                                                                       |
| C-7             | SH-C6-CGCCTAAACAAGTGGAGACTGTG                                                                                       |
| D-7             | SH-C6-AACGCTCACCACCTGAACACCTC                                                                                       |
| A-17-capture    | ACATTCCTAAGTCTGAAACATTACAGCTTGCTACACGAGAAGAGCCGCCATAGTATTTTTTTTTT <b>GATTTTCTTCCTTTTGTTTC</b>                       |
| B-17            | SH-C6-TATCACCAGGCAGTTGACAGTGTAGCAAGCTGTAATAGATGCGAGGGTCCAATAC                                                       |
| C-17            | SH-C6-TCAACTGCCTGGTGATAAAACGACACTACGTGGGAATCTACTATGGCGGCTCTTC                                                       |
| D-17            | SH-C6-TTCAGACTTAGGAATGTGCTTCCACGTAAGTGTGCTTTGTATTGGACCCTCGCAT                                                       |
| A-26-capture    | GCCTGGAGATACATGCACATTACGGCTTTCCCTATTAGAAGGTCTCAGGTGCGCGTTTCGGTAAGTAGACGGGACCAGTTCGCCATTTTTTTTTTGATTTTCTTCCTTTTGTTTC |
| B-26            | SH-C6-CGCGCACCTGAGACCTTCTAATAGGGTTTGGCAGAGTCGTTCAACTAGAAATGCCCTTTGGGCTGTTCCGGGTGTGGCTCGTCGG                         |
| C-26            | SH-C6-GGCCGAGGACTCCTGCTCCGCTGCGGTTTGGCGAACTGGTCCCGTCTACTTACCGTTTCCGACGAGCCACACCCGGAACAGCCC                          |
| D-26            | SH-C6-GCCGTAATGTGCATGTATCTCCAGGCTTTCCGCAGCGGAGCAGGAGTCCTCGGCCTTTGGGCATTCTAGTTGAACGACTGTGCG                          |
| Single capturer | SH-C6-GAGCGTTAGCTTTTTTTTTT <b>GATTTTCTTCCTTTTGTTTC</b>                                                              |
| Target-BRCA-1   | <b>TGGTAACAGTGTGAGGTTTAACGGAACAAAAGGAAGAAAATC</b>                                                                   |
| BRCA-1-biotin   | Biotin- <b>GAACAAAAGGAAGAAAATC</b>                                                                                  |
| H1-biotin       | Biotin- <b>CGTTAAACCTCACACTGTTACCAAGTTTGTGGTAACAGTGTGAGGT</b>                                                       |
| H2-biotin       | Biotin- <b>TGGTAACAGTGTGAGGTTTAACGACCTCACACTGTTACCACAACT</b>                                                        |

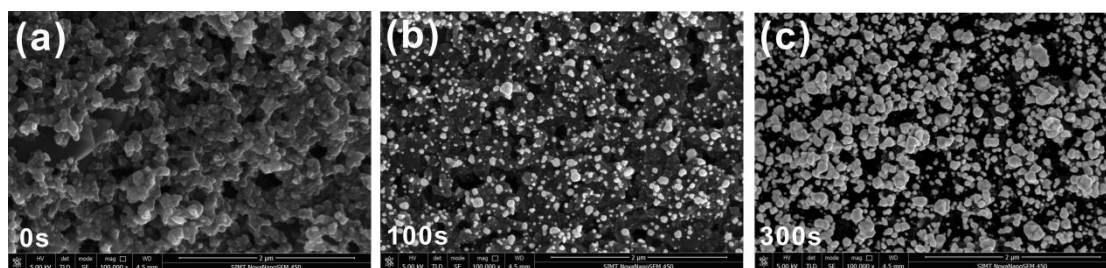

**Figure S1.** The SEM images of the bare SPCE (a) and SPGE with different deposition time: 100 s (b), 300 s (c). The scale value was 2 μm.

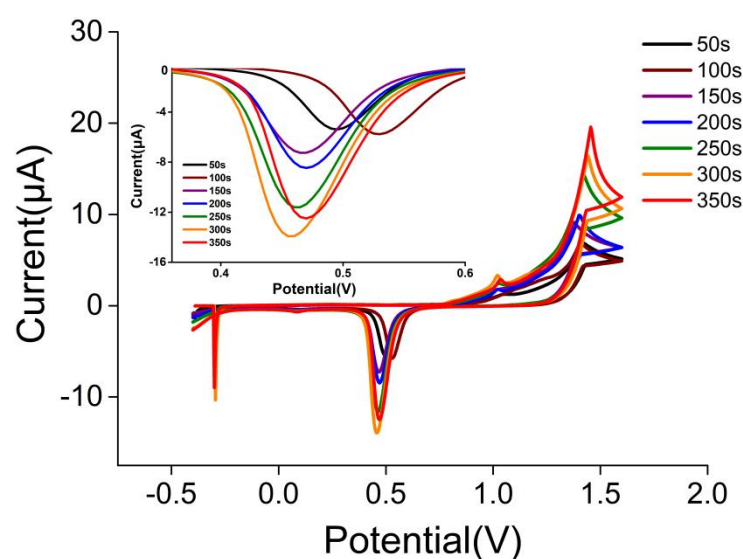

**Figure S2.** Investigation on the deposition time of HAuCl<sub>4</sub>. The integral CVs results recorded for the Au NPs modified 16-SPCE in 0.5 M H<sub>2</sub>SO<sub>4</sub>, scan rate: 100 mV/s.

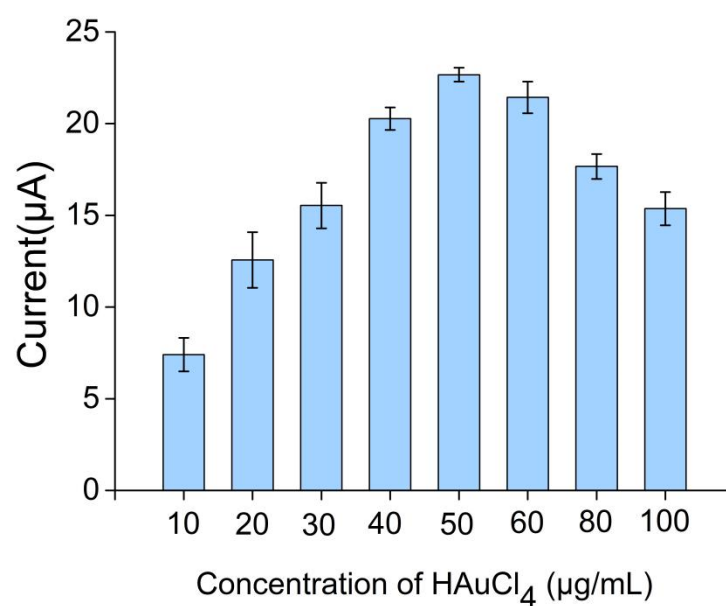

**Figure S3.** Investigation on the concentration of HAuCl<sub>4</sub>. CVs results responded for 10, 20, 30, 40, 50, 60, 80, 100 μg/mL HAuCl<sub>4</sub> solution. The Au NPs modified 16-SPCE was scanned in 0.5 M H<sub>2</sub>SO<sub>4</sub>.

The electrodeposition time was 300 s. Error bars represented the SD of at least 3 independent experiments.

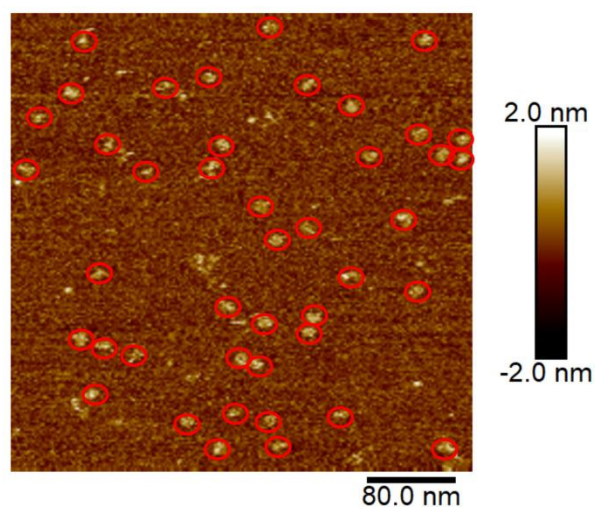

**Figure S4.** The structure characterization of TDF-17 by AFM. The average edge length of the TDF-17 measured was about 6.194 nm, which was close to the theoretical value (5.8 nm). Scale bar = 80nm.

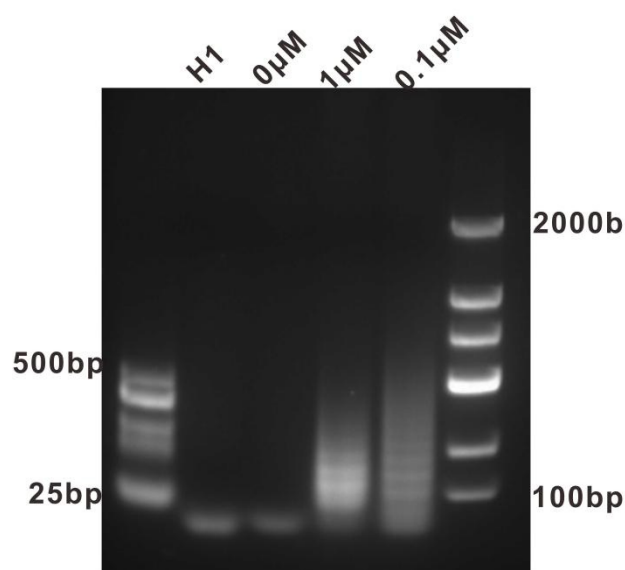

**Figure S5.** Agarose gel electrophoresis image analysis for HCR. From left to right, lane1 and lane6, 20-bp and 2000-bp DNA ladder markers, respectively; Lane2, H1; Lane3, H1 + H2, without initiator; Lane4, H1 + H2 + initiator (1  $\mu$ M ); Lane5, H1+H2+initiator (0.1  $\mu$ M ).

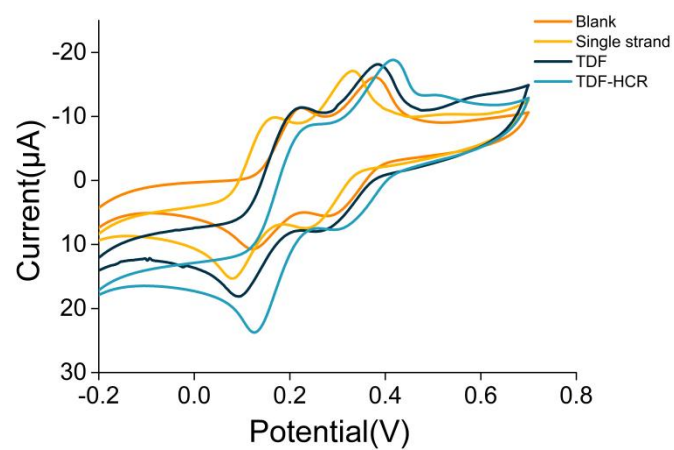

**Figure S6.** Typical CV curves for different probes modified on SPGE at target concentration of 1 nM. It conducted at a scanning rate of 0.1 V/s ranging from −0.3 V to 0.7 V.
